# Supplementary material
Source: Springer Nature journal article supplement (https://www.springermedizin.de/resource/supplementary/12916_2013_955_MOESM2_ESM.pdf/9598902)
Supplement: MOESM2 [file 9598902]

| Variable                                                                   | Score | Variable                      | Score     |
|----------------------------------------------------------------------------|-------|-------------------------------|-----------|
| Age                                                                        | <75   | Basal dyspnea (MRC Scale)     | Grade 1-4 |
|                                                                            | 75-85 |                               | Grade 5   |
|                                                                            | >85   |                               |           |
| Use of inspiratory accessory muscle or paradoxical breathing at ED arrival | 4     | Glasgow altered at ED arrival | 3         |
|                                                                            |       | Previous LT-DOT or NIMV       | 3         |

SCORE 0-18

SCORE 0

n=1081

SCORE 2-6

n=865

SCORE 7-11

n=441

SCORE 12-18

n=97

|                                        | n(%)      |
|----------------------------------------|-----------|
| Short term Mortality <sup>b,c,d</sup>  | 3(0.28)   |
| In hospital Mortality <sup>b,c,d</sup> | 1(0.17)   |
| 1 month Mortality <sup>b,c,d</sup>     | 5(0.46)   |
| ICU <sup>c,d</sup>                     | 2(0.34)   |
| IMV <sup>c,d</sup>                     | 6(1.01)   |
| IRCU <sup>b,c,d</sup>                  | 38(6.41)  |
| ICU-IRCU or IMV <sup>b,c,d</sup>       | 38 (6.41) |

MILD (a)

|                                        | n(%)       |
|----------------------------------------|------------|
| Short term Mortality <sup>a,c,d</sup>  | 11(1.27)   |
| In hospital Mortality <sup>a,c,d</sup> | 11(2.06)   |
| 1 month Mortality <sup>a,c,d</sup>     | 22(2.54)   |
| ICU <sup>c,d</sup>                     | 7(1.31)    |
| IMV <sup>c</sup>                       | 10(1.87)   |
| IRCU <sup>a,c,d</sup>                  | 77(14.37)  |
| ICU-IRCU or IMV <sup>a,d</sup>         | 80 (14.93) |

MODERATE (b)

|                                        | n(%)        |
|----------------------------------------|-------------|
| Short term Mortality <sup>a,b,d</sup>  | 20(4.54)    |
| In hospital Mortality <sup>a,b,d</sup> | 19(5.94)    |
| 1 month Mortality <sup>a,b,d</sup>     | 32(7.26)    |
| ICU <sup>a,b,d</sup>                   | 17(5.31)    |
| IMV <sup>a,b</sup>                     | 15(4.69)    |
| IRCU <sup>a,b</sup>                    | 99(30.94)   |
| ICU-IRCU or IMV <sup>a</sup>           | 108 (33.75) |

SEVERE (c)

|                                        | n(%)       |
|----------------------------------------|------------|
| Short term Mortality <sup>a,b,c</sup>  | 24(24.74)  |
| In hospital Mortality <sup>a,b,c</sup> | 24(27.91)  |
| 1 month Mortality <sup>a,b,c</sup>     | 28(28.87)  |
| ICU <sup>a,b,c</sup>                   | 11(12.79)  |
| IMV <sup>a</sup>                       | 4(4.65)    |
| IRCU <sup>a,b</sup>                    | 28(32.56)  |
| ICU-IRCU or IMV <sup>a,b</sup>         | 30 (34.88) |

VERY SEVERE (d)
